# Supplementary material
Source: publisher site journal article supplement (https://static.cambridge.org/content/id/urn:cambridge.org:id:article:S0090599220000264/resource/name/S0090599220000264supp002.docx)
Supplement: Supplementary file 1 [file S0090599220000264supp002.docx]

**Appendix**

Survey questions used for the construction of the dependent variable and their recoding.

**Ethnic Group Affiliation**

Q1. Do you have friends from among other ethnicities?

| Response choices | Initial | Recoded |
| --- | --- | --- |
| Yes | 1 | 0 |
| No | 2 | 1 |
| Hard to say | 3 | . |

Q2. Do you think it is necessary to form the branches of power according to the percentages of various ethnicities?

| Response choices | Initial | Recoded |
| --- | --- | --- |
| Yes | 1 | 1 |
| No | 2 | 0 |
| Hard to say | 3 | . |

Q3. Should the newcomers adopt the traditions, lifestyle, and customs of the local population and not retain their own?

| Response choices | Initial | Recoded |
| --- | --- | --- |
| Yes | 1 | 1 |
| Somewhat yes | 2 | 1 |
| Somewhat no | 3 | 0 |
| No | 4 | 0 |
| Exchange the best each can offer | 5 | 0.5 |
| Hard to say | 6 | . |

Q4. Are you in general satisfied with the situation in your republic?

| Response choices | Initial | Recoded |
| --- | --- | --- |
| Satisfied | 1 | 1 |
| Somewhat satisfied | 2 | 1 |
| Somewhat dissatisfied | 3 | 0 |
| Dissatisfied | 4 | 0 |
| Hard to say | 5 | . |

Q5. Which of these statements reflects your opinion most closely?

*For dominant North Caucasian ethnicities*

| Response choices | Initial | Recoded |
| --- | --- | --- |
| Federal government should have more powers than currently | 1 | 0 |
| Republican government should have more powers than currently | 2 | 1 |
| Republic should have more powers to manage the economy | 3 | 1 |
| Everything should stay the same | 4 | 0.5 |
| Hard to say | 5 | . |

*For ethnic Russians*

| Response choices | Initial | Recoded |
| --- | --- | --- |
| Federal government should have more powers than currently | 1 | 1 |
| Republican government should have more powers than currently | 2 | 0 |
| Republic should have more powers to manage the economy | 3 | 0 |
| Everything should stay the same | 4 | 0.5 |
| Hard to say | 5 | . |

Q6. What is your attitude to the fact that since January 2005 heads of republics are elected by the parliaments of the republics at Russian president’s suggestion and not by the voters?

*For dominant North Caucasian ethnicities*

| Response choices | Initial | Recoded |
| --- | --- | --- |
| Approve | 1 | 0 |
| Somewhat approve | 2 | 0 |
| Somewhat disapprove | 3 | 1 |
| Disapprove | 4 | 1 |
| Hard to say | 5 | . |

*For ethnic Russians*

| Response choices | Initial | Recoded |
| --- | --- | --- |
| Approve | 1 | 1 |
| Somewhat approve | 2 | 1 |
| Somewhat disapprove | 3 | 0 |
| Disapprove | 4 | 0 |
| Hard to say | 5 | . |

**Religious Group Affiliation**

Q1. Would you like to live in a secular or in shariah state?

| Response choices | Initial | Recoded |
| --- | --- | --- |
| Secular | 1 | 0 |
| Somewhat in secular | 2 | 0 |
| Somewhat in shariah | 3 | 1 |
| Shariah | 4 | 1 |
| Hard to say, refuse to answer | 5 | . |

Q2. Should religious education be introduced in schools?

| Response choices | Initial | Recoded |
| --- | --- | --- |
| Yes | 1 | 1 |
| Somewhat yes | 2 | 1 |
| Somewhat in special schools | 3 | 1 |
| Yes. In special schools | 4 | 1 |
| Voluntarily with parents' consent | 5 | 0 |
| Hard to say, refuse to answer | 6 | . |

Q3. Should the clerical organizations (Christian Orthodox, Muslim, and others) take part in resolving the state affairs?

| Response choices | Initial | Recoded |
| --- | --- | --- |
| Yes | 1 | 1 |
| Somewhat yes | 2 | 1 |
| Somewhat no | 3 | 0 |
| No | 4 | 0 |
| Hard to say, refuse to answer | 5 | . |

Q4. Do you read Quran, Bible, and other religious scriptures prescribed for reading? If yes, how often?

| Response choices | Initial | Recoded |
| --- | --- | --- |
| Never read them | 1 | 0 |
| Read some time ago the Bible (Quran) | 2 | 0.5 |
| Sometimes read the Bible (Quran) | 3 | 1 |
| Regularly read the Bible (Quran) and irregularly other prescribed readings | 4 | 1 |
| Regularly read the Bible (Quran) and other prescribed readings | 5 | 1 |
| Hard to say, refuse to answer | 9 | 0 |

Q5. Do you follow the primary religious rituals?

| Response choices | Initial | Recoded |
| --- | --- | --- |
| Yes | 1 | 1 |
| Somewhat yes | 2 | 1 |
| Somewhat no | 3 | 0 |
| No | 4 | 0 |
| Hard to say, refuse to answer | 5 | . |

**The Hypothesis Variable**

To what group of population would you refer your family?

| Response choices | Initial | Recoded |
| --- | --- | --- |
| Not enough money for food | 1 | 1 |
| Enough money for food, but not for clothing | 2 | 2 |
| Enough money for food and clothing | 3 | 3 |
| Sometimes we can buy expensive items | 4 | 4 |
| We can afford everything | 5 | 5 |
| Hard to say | 6 | . |

**Bayesian Analysis of Multiethnic and Monoethnic Republics of the North Caucasus**

Table 1A. Bayes Estimation. Multinomial Model with Base Religion in Multiethnic Republics (Adygea, Dagestan, Kabardino-Balkaria, Karachay-Cherkessia, and North Ossetia)

Table 1aa. Ethnicity Table 1bb. Mixed

| Predictors | 2.5% | Mean | 97.5% | 2.5% | Mean | 97.5% |
| --- | --- | --- | --- | --- | --- | --- |
| Income | 0.10 | 0.17 | 0.25 | -0.06 | 0.03 | 0.15 |
| Income sq. | -0.19 | -0.12 | -0.06 | -0.12 | -0.06 | -0.00 |
| Male | 0.07 | 0.18 | 0.22 | -0.10 | -0.06 | 0.01 |
| Age | 0.06 | 0.24 | 0.37 | 0.01 | 0.09 | 0.18 |
| Urban | -0.08 | 0.02 | 0.13 | -0.08 | -0.04 | 0.04 |
| Russian | 0.08 | 0.15 | 0.22 | -0.01 | 0.11 | 0.23 |
| Dominant ethnicity | 0.39 | 0.48 | 0.57 | 0.45 | 0.63 | 0.74 |
| Distrust strangers | -0.05 | 0.01 | 0.12 | -0.20 | -0.12 | 0.01 |

*Note: N=858, non-informative priors, 100,000 iterations, 10 chains, Metropolis acceptance rate for beta ~ 0.24.*

Table 2A. Bayes Estimation. Multinomial Model with Base Ethnicity in Multiethnic Republics (Adygea, Dagestan, Kabardino-Balkaria, Karachay-Cherkessia, and North Ossetia)

|  | Table 2aa. Religion | | | Table 2bb. Mixed | | |
| --- | --- | --- | --- | --- | --- | --- |
| Predictors | 2.5% | Mean | 97.5% | 2.5% | Mean | 97.5% |
| Income | -0.25 | -0.17 | -0.10 | -0.23 | -0.14 | -0.02 |
| Income sq. | 0.05 | 0.13 | 0.19 | -0.01 | 0.06 | 0.13 |
| Male | -0.22 | -0.14 | -0.07 | -0.25 | -0.21 | -0.13 |
| Age | -0.37 | -0.19 | -0.06 | -0.20 | -0.13 | -0.04 |
| Urban | -0.13 | -0.03 | 0.08 | -0.11 | -0.06 | 0.02 |
| Russian | -0.24 | -0.15 | -0.07 | -0.17 | -0.04 | 0.08 |
| Dominant ethnicity | -0.59 | -0.46 | -0.37 | -0.04 | 0.12 | 0.27 |
| Distrust strangers | -0.13 | -0.06 | 0.06 | -0.23 | -0.15 | -0.03 |

*Note: N=858, non-informative priors, 100,000 iterations, 10 chains, Metropolis acceptance rate for beta ~ 0.24.*

Table 3A. Bayes Estimation. Multinomial Model with Base Religion in Monoethnic Republics (Chechnya and Ingushetia)

|  | Table 3aa. Ethnicity | | | Table 3bb. Mixed | | |
| --- | --- | --- | --- | --- | --- | --- |
| Predictors | 2.5% | Mean | 97.5% | 2.5% | Mean | 97.5% |
| Income | -0.77 | -0.53 | -0.31 | -0.60 | -0.44 | -0.15 |
| Income sq. | -0.16 | 0.07 | 0.27 | -0.14 | -0.04 | 0.06 |
| Male | -0.95 | -0.68 | -0.59 | -0.24 | -0.13 | 0.02 |
| Age | -0.55 | -0.08 | 0.27 | -0.20 | -0.16 | -0.02 |
| Urban | -0.08 | 0.14 | 0.43 | 0.20 | 0.28 | 0.39 |
| Russian | 0.37 | 0.55 | 0.86 | -0.86 | -0.57 | -0.30 |
| Dominant ethnicity | 0.05 | 0.27 | 0.64 | 0.18 | 0.45 | 0.67 |
| Distrust strangers | 0.08 | 0.19 | 0.52 | -0.23 | -0.17 | 0.00 |

*N=318, non-informative priors, 100,000 iterations, 10 chains, Metropolis acceptance rate for beta ~ 0.22.*

Table 4A. Bayes Estimation. Multinomial Model with Base Ethnicity in Monoethnic Republics (Chechnya and Ingushetia)

|  | Table 4aa. Religion | | | Table 4bb. Mixed | | |
| --- | --- | --- | --- | --- | --- | --- |
| Predictors | 2.5% | Mean | 97.5% | 2.5% | Mean | 97.5% |
| Income | 0.31 | 0.61 | 0.77 | -0.13 | 0.15 | 0.46 |
| Income sq. | -0.24 | -0.04 | 0.13 | -0.32 | -0.05 | 0.12 |
| Male | 0.65 | 0.78 | 0.89 | 0.51 | 0.65 | 0.81 |
| Age | -0.26 | 0.19 | 0.53 | -0.18 | 0.02 | 0.25 |
| Urban | -0.46 | -0.25 | 0.12 | -0.15 | -0.02 | 0.39 |
| Russian | -0.76 | -0.68 | -0.20 | -1.46 | -1.12 | -0.81 |
| Dominant ethnicity | -0.64 | -0.38 | -0.05 | -0.16 | 0.10 | 0.32 |
| Distrust strangers | -0.46 | -0.36 | -0.14 | -0.60 | -0.54 | -0.24 |

*N=378, non-informative priors, 1,000 iterations, 10 chains, Metropolis acceptance rate for beta ~ 0.22.*
